# Supplementary material for: Carbon Burial in two Greenland Fjords: Exploring the Influence of Glacier Type on Organic Carbon Dynamics
Source: Copernicus journal article supplement (doi:10.5194/egusphere-2025-102), 2025-05-21
Supplement: Supplementary file [file egusphere-2025-102-AC2-supplement.pdf]

We are grateful to you for the time you invested in providing detailed and helpful feedback. Your comments have been invaluable in refining and strengthening our manuscript.

As a general clarification, we updated the station names for Nuup Kangerlua from GF6, GF7, etc., which referenced the Danish name Godthåbsfjord, to NK6, NK7, etc., to more clearly reflect their association with Nuup Kangerlua and enhance consistency throughout the manuscript.

We therefore added:

**Line 137:** It is important to note that earlier studies (e.g., Mortensen et al., 2011, 2014, 2018; Meire et al., 2015, 2017; Stuart-Lee et al., 2021, 2023) referred to the same stations in Nuup Kangerlua using the prefix “GF”, derived from the Danish name *Godthåbsfjord*. In this study, we use the prefix “NK” instead, to reflect the Greenlandic name *Nuup Kangerlua*.

To avoid confusion, we updated this naming (NK) in your comments as well. We also numbered your questions and highlighted them in bold to clearly structure our responses.

### **Abstract**

#### **(1) L1 – Fjords play a crucial role in the burial of OC – not they are crucial – same as L26 of introduction.**

We applied your remark. In addition, agreeing with your comment on Blue carbon (as you commented in the introduction: comment (3)) and based on the paper you recommended (Howard et al., 2023), we removed “blue carbon” as it is indeed not the most correct use given the link with policy and management/mitigation practices, which is not the focus of this paper.

**Line 14:** Fjord systems play a crucial role in the burial and long-term storage of organic carbon (OC).

#### **(2) L23-25 – duplicated sentences – could be combined.**

Taking your comment and the comment of another reviewer into account, the last part of the abstract was rewritten as follows:

**Lines 24-29:** Despite different glacial regimes, the two investigated fjord systems showed similar traits with OC predominantly of marine origin and similar OCBRs of  $18.0 \pm 1.6$  and  $16.2 \pm 1.7$  g m<sup>-2</sup> yr<sup>-1</sup> in Nuup Kangerlua and Ameralik, respectively. Higher Chl-a and OC contents were recorded in the sediments of outer and mid Ameralik compared to those in Nuup Kangerlua. The results underscore that benthic – pelagic coupling in glacial fjords is complex, emphasizing the need for further research to disentangle the interactions driving primary production, lateral and vertical OC transport, as well as OC degradation and preservation.

### **Introduction**

#### **(3) L28 ‘Blue carbon’ – this isn’t defined but should be. Sediments are currently understood to be ‘emerging’ blue carbon systems and are not accepted as ‘actionable’ blue carbon systems (See Howard et al., 2023)? The term isn’t mentioned again so why use it at all? Regarding the reference to Smith et al., 2015: Does the annual blue carbon burial include mangroves, seagrass and saltmarsh? Smith’s paper discussed fjords in the context of global sedimentary carbon only.**

As earlier mentioned in our reply to comment (1), we replaced “blue carbon” by “carbon”:

**Line 35:** Fjord systems play a crucial role in burial and long-term storage of organic carbon (OC), contributing to approximately a tenth of the annual carbon burial (Smith et al., 2015).

**(4) L32 – could also mention southern-hemisphere countries that have looked at OC burial in fjords -e.g. Chile.**

We added research on OC burial in the Southern hemisphere:

**Line 40:** In the Southern Hemisphere, estimates of OC burial in fjord systems are comparatively sparse and largely confined to a few regions, including Patagonia (Sepúlveda et al., 2011), South Georgia (Berg et al., 2021), Antarctica (Eidam et al., 2019), and New Zealand (Hinojosa et al., 2014; Cui et al., 2016b).

And adjusted the subsequent sentence (**line 43**) to enhance connection between sentences:

Despite this growing body of research in both hemispheres, Greenland remains markedly underrepresented in global carbon budgets (Smith et al., 2015), even though its coast is fringed by a myriad of fjords, including some of the most extensive fjord systems in the Arctic.

Added references are:

Berg, S., Jivcov, S., Kusch, S., Kuhn, G., White, D., Bohrmann, G., Melles, M., en Rethemeyer, J.: Increased petrogenic and biospheric organic carbon burial in sub-Antarctic fjord sediments in response to recent glacier retreat, *Limnology And Oceanography*, 66, 4347–4362, <https://doi.org/10.1002/lno.11965>, 2021.

Eidam, E. F., Nittrouer, C. A., Lundesgaard, Ø., Homolka, K. K., en Smith, C. R.: Variability of Sediment Accumulation Rates in an Antarctic Fjord, *Geophysical Research Letters*, 46, 13271–13280, <https://doi.org/10.1029/2019gl084499>, 2019.

Sepúlveda, J., Pantoja, S., & Huguen, K. A. (2010). Sources and distribution of organic matter in northern Patagonia fjords, Chile (~44–47°S): A multi-tracer approach for carbon cycling assessment. *Continental Shelf Research*, 31(3–4), 315–329. <https://doi.org/10.1016/j.csr.2010.05.013>

**(5) L57 – depends on terrestrial vegetation found within the catchment – rather than growth specifically?**

We agree with your remark and changed “terrestrial vegetation growth” to “terrestrial vegetation”: **Line 69** “In general, the effectiveness of trapping OC varies among fjords and depends on (1) the productivity of the fjord waters, particularly phytoplankton growth, as well as terrestrial vegetation in the catchment, ...”

**(6) L60 – 62 – sediment type also important. The type and spatial distribution of sediment will be somewhat controlled by fjord geomorphology and current dynamics already mentioned – but %clay and presence of Fe minerals within the sediment has a control on the availability of OC and its degradation potential (see: Lalonde et al., 2012; Hunt et al., 2020; Moore et al., 2023)**

Thank you for your insight. We extended **line 74:** (3) factors limiting the degradation of settled OC, among which the refractory nature of OC (Koziorowska et al., 2015; Zaborska et al., 2018), adsorption to clay minerals (Kennedy and Wagner, 2011; Daidu, 2006), binding with reactive iron and manganese phases (Lalonde et al., 2012; Faust et al., 2021; 2023; Moore et al., 2023), sedimentation rate (Placitu et al., 2024; Watts et al., 2024) and bottom water redox conditions (Hinojosa et al., 2014).

- (7) Line 66 – sequestration refers to the removal of carbon dioxide from the atmosphere. Within sediments, as passive receivers of organic matter, the term OC accretion of burial is more appropriate.

Thank you for the clarification. We agree that “burial” or “accretion” is more accurate in this context, as sediments indeed act as passive receivers of organic carbon. We have revised the text accordingly at [line 79](#): “...may lead to increased carbon burial in fjord sediments compared to LTG-influenced fjord systems...”

## **Materials and Methods**

- (8) Figure 1 – could the red dots instead be changed to one colour to represent the LTGs and another colour to represent the MTGs? Station labels would be helpful

We improved Figure 1 ([line 122](#)) by:

- Adding a legend, depicting stations sampled in Nuup Kangerlua and stations in Ameralik in a different color.
- Adding station labels and adjusting the symbol of Nuuk to differentiate it from the station symbols.
- Situating the outer, mid and inner zone in the (b) panel.
- Enlarging (a) and (b) panel.

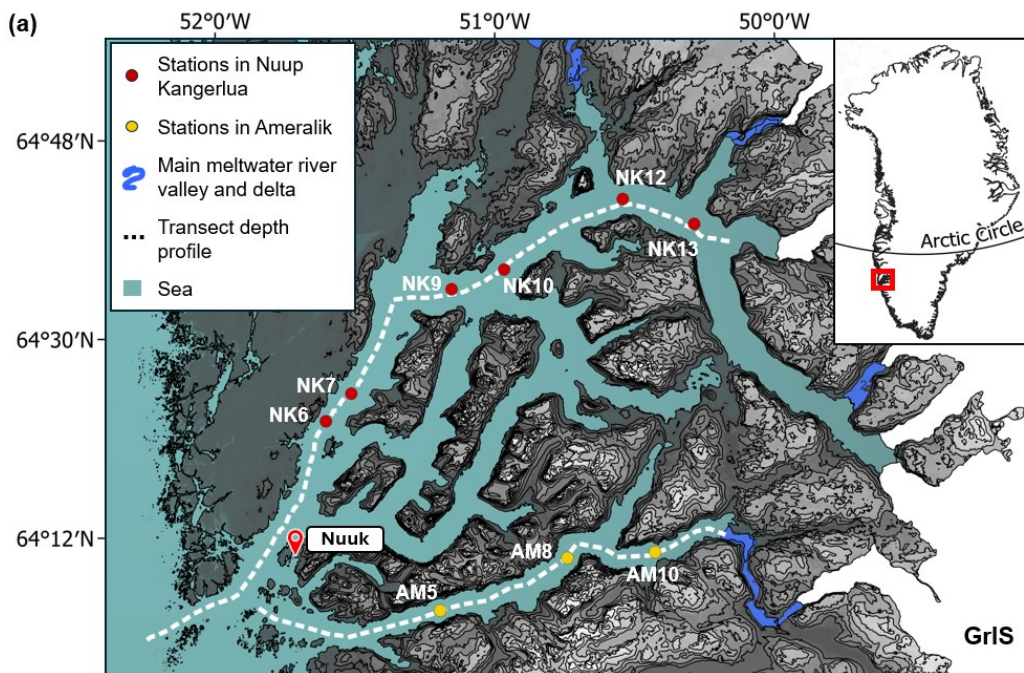

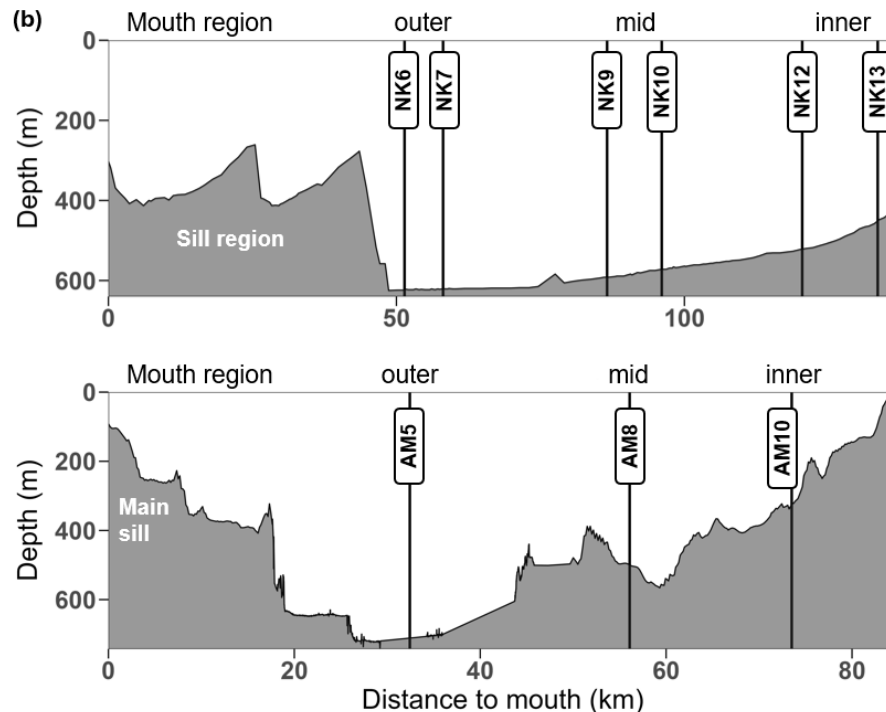

**Figure 1. (a)** Map showing sampling locations in Nuup Kangerlua (fed by three marine-terminating glaciers and three land-terminating glaciers) and Ameralik (receiving meltwater from a land-terminating glacier). Greenland Ice Sheet (GrIS) is depicted in white. **(b)** Water depth profiles along-axis (white dashed lines) Nuup Kangerlua (top) and Ameralik (bottom). Both fjord basins are divided in an outer, mid and inner section behind the entrance sill(s).

#### **(9) Section 2.2.1 – more appropriate to call this ‘Core Sampling’?**

Section 2.2.1 was changed to “Core sampling and processing” ([line 141](#)).

#### **(10) L127 - Why was the 2021 campaign more exploratory?**

The first campaign had fewer stations since it was the first that sediments were sampled in these fjords, hence the exploratory character of the campaign.

However, we adjusted [line 145](#): Fewer sediment stations were sampled in 2021 compared to 2022; however, bottom water temperature measurements were obtained in both years (Table 1).

#### **(11) 2.3 - More detail needed here. Think about how someone would replicate your analysis exactly. E.g., not sure what has been done here: ‘Porosity was obtained by dividing the porewater volume by the wet sediment volume.’**

Implementing your comment together with the comments of the other 2 reviewers, the 2.3 Sediment analysis section was rewritten as follows: [line 159-210](#):

Grain size, porosity and dry bulk density were measured to provide insights into the physical structure and depositional environment of the sediment column. High porosity typically indicates fine-grained, loosely packed sediments with higher water content, which are common in low-energy depositional environments. Conversely, lower porosity may suggest coarser, more compacted sediments, potentially reflecting higher-energy conditions or post-depositional consolidation. Grain size distribution was determined on oven-dried samples (at 60 °C for 48 h). After homogenization, coarse material > 2 mm was

removed by sieving. A subsample of 0.1 – 1 g was resuspended in water and analyzed using a Malvern Mastersizer 2000 with the Hydro 2000S module (size range: 0.02 – 2000  $\mu\text{m}$ ), which operates based on laser diffraction. The sample is sonicated for 60 s to prevent flocculation of clays before it goes through the laser prior measurement. No pretreatment to remove organic or inorganic carbon was performed prior to analysis. Grain size fractions were classified according to the Wentworth scale (1922) as clay (< 4  $\mu\text{m}$ ), silt (4 – 63  $\mu\text{m}$ ), and sand (63 – 500  $\mu\text{m}$ ).

Results were categorized in clay (<4 mm), silt (4–63 mm), and sand (63–500 mm) fractions conform Wentworth scale classification (1922). Sediment porosity was estimated gravimetrically using a modified water displacement method. A pre-weighed 10 mL graduated measuring cylinder was filled with 2 – 5 g of homogenized wet sediment. After careful addition of ultrapure water (Milli-Q) to the 10 mL mark (measured by the lower meniscus), the cylinder was weighed again. The sample was then dried at 80 °C for ~48 h and reweighed. Porosity ( $\phi$ ) was calculated based on the difference between the wet sediment weight and the dry sediment weight (i.e., the mass of porewater), recalculated to pore water volume through correction for salinity and divided by the estimated volume occupied by the sediment (calculated as 10 ml minus the volume of water added). Dry bulk density was obtained by dividing dry mass by bulk volume.

To determine total carbon (TC), total organic carbon (TOC), and total nitrogen (TN), sediment samples were oven-dried at 60 °C for 48 hours ground using mortar and pestle, and homogenized. Between 20 – 35 mg of dried and homogenized sediment was weighed and placed into pre-weighed silver cups. For TC and TN analysis, silver cups were sealed by folding with tweezers into compact spheres to ensure complete combustion. For TOC analysis, carbonate removal was performed by stepwise acidification: 2 – 3 drops of increasing concentrations of HCl (1%, 2%, 5%, and 10%) were added sequentially using a glass pipette. After each addition, samples were dried at 60 °C for 1 to 2 hours. This procedure was repeated over 2 – 3 days until no bubbling was observed and carbonate removal was confirmed. All measurements were conducted using a Flash 2000 NC Sediment Analyzer (Interscience), which quantifies carbon and nitrogen via dynamic flash combustion and chromatographic separation. From these data, the molar C:N ratios were calculated dividing TOC by TN and inorganic carbon (IC) was determined by subtracting TOC from TC. To investigate the origin of the organic matter (see 2.3.1), stable isotope composition ( $\delta^{13}\text{C}$  and  $\delta^{15}\text{N}$ ) was measured with an elemental analyzer (Thermo Flash EA1112 element analyzer) coupled to an isotope ratio mass spectrometer (Thermo Finnigan Delta V, IRMS). Prior to analysis, the same steps were followed as for TOC and TN analysis, except samples were freeze dried.

Samples were dried and homogenized, then analyzed for total sedimentary carbon (TC) and total nitrogen (TN). After decalcification with 37 % HCl, total organic carbon (TOC) was also measured. All measurements were conducted using a Flash 2000 NC Sediment Analyzer (Interscience). From these data, the molar CN ratios were calculated and inorganic carbon (IC) was determined by subtracting TOC from TC. To investigate the origin of the organic matter (see further), stable isotope composition ( $\delta^{13}\text{C}$  and  $\delta^{15}\text{N}$ ) was measured with an elemental analyzer (Thermo Flash EA1112 element analyzer) coupled to an isotope ratio mass spectrometer (Thermo Finnigan Delta V, IRMS). To explore how glacier type affects marine primary productivity and whether and how it is incorporated in the sediment, we additionally measured, for each sediment slice, the content of chlorophyll-a (Chl-a) and of its degradation products (pheophorbide-a, and pheophytin-a, pheophorbide-a like, and pheophytin-a like following Wright and Jeffrey (1997). For pigments extraction, 2 mL acetone (90%) was added to 0.5 g freeze dried sediment under red light conditions preventing pigment degradation. The samples were subsequently sonicated for 30 s and incubated overnight at 4 °C in the dark to aid pigment release. Afterwards, the samples were centrifuged (10 min, 4 000 rpm, 4 °C) and the supernatant was passed through 0.2  $\mu\text{m}$  PTFE filters.

Pigment separation was performed using an HPLC system (Agilent 1200 Infinity II, Agilent Technologies) equipped with a cooled auto-sampler, column oven, photodiode array detector, and fluorescence detector, following the method of Van Heukelem and Thomas (2001). Chlorophyll a and its degradation products were identified at 665 nm wavelength. Individual pigment concentrations were determined using the response factors of the respective standards. These different pigments were determined by the response factor of standard pigments as described by Van Heukelem and Thomas (2001). The ratio of Chl-a to Chloroplastic Pigment Equivalent (CPE, comprising the sum of all aforementioned pigments) was used as a proxy for the “freshness” or lability of photosynthetically produced organic matter (Schubert et al., 2005; Koho et al., 2008).

**(12) L155 – some more description as to why these parameters help to differentiate between terrestrial and marine-derived material would be helpful.**

We added the following to the 2.3.1 Calculation of marine organic carbon fraction section: **line 212-219:** Stable isotope composition in addition to C:N ratios of settled organic matter in fjord sediments has been used in multiple studies to estimate the proportion of marine versus terrestrially derived organic matter (St-Onge and Hillaire-Marcel, 2001; Koziorowska et al., 2015; Smeaton & Austin, 2017; Zaborska et al., 2018; Faust and Knies, 2019; Limoges et al., 2020; Placitu et al., 2024). Terrestrial organic matter, primarily derived from vascular plants, tends to have higher C:N ratios ( $> 12$ ) and more depleted  $\delta^{13}\text{C}$  values ( $-25$  to  $-30$  ‰  $\delta^{13}\text{C}$ ) due to the dominance of lignin-rich, cellulose-based material and the use of  $\text{C}_3$  photosynthesis pathways (Lamb et al., 2006). In contrast, marine organic matter, originating from phytoplankton and other aquatic organisms, typically shows lower C:N ratios and less negative  $\delta^{13}\text{C}$  values ( $-18$  to  $-24$  ‰  $\delta^{13}\text{C}$ ), reflecting a protein-rich composition and different carbon fixation mechanisms (Lamb et al., 2006).

**(13) L166 – Why were the top 2 cm of sediment only used?**

We took the upper 2 cm to be able to compare with literature as well as to avoid potential bias due to degradation processes. We added **line 239:** “...where  $\delta^{13}\text{C}_i$  represents the surface sediment values (0 – 2 cm) of  $\delta^{13}\text{C}_{\text{org}}$  of each sample,  $\delta^{13}\text{C}_M$  is the marine end-member and  $\delta^{13}\text{C}_T$  is the terrestrial end-member. Only the upper 0 – 2 cm was used to be able to compare with literature.

**(14) L168 – is the same terrestrial end member as Faust’s appropriate here? What are the dominant vegetation type within these study fjords?**

We added the following to the “2.3.1 Calculation of marine organic carbon fraction section”: **Line 227-234:** The catchments of both fjords consist of tundra shrub vegetation, which are typically  $\text{C}_3$  plants. Published  $\delta^{13}\text{C}$  values for terrestrial plant material in Greenland remain limited, but available data indicate a range of  $-33.9$ ‰ to  $-26.9$ ‰ (Thompson et al., 2018). However, due to the scarcity of  $\delta^{13}\text{C}$  records specific to Greenland’s marine organic matter, terrestrial vegetation and soil, we adopted end-member values from nearby Arctic and sub-Arctic systems. For the marine end-member, we used a  $\delta^{13}\text{C}$  value of  $-20.6$ ‰, consistent with those reported in Svalbard studies by Winkelmann and Knies, and Koziorowska et al. (2015). We used the marine end-member value from Faust and Knies (2019), originally applied in sub-Arctic Norwegian fjords, as it falls within the broader  $\delta^{13}\text{C}$  range of Arctic terrestrial organic matter ( $-35$ ‰ to  $-25$ ‰) reported by Kuliński et al. (2014).

We added following references:

Limoges, A., Weckström, K., Ribeiro, S., Georgiadis, E., Hansen, K. E., Martinez, P., Seidenkrantz, M., Giraudeau, J., Crosta, X., en Massé, G.: Learning from the past: Impact of the Arctic Oscillation on sea



ice and marine productivity off northwest Greenland over the last 9,000 years, *Global Change Biology*, 26, 6767–6786, <https://doi.org/10.1111/gcb.15334>, 2020.

Thompson, H. A., White, J. R., and Pratt, L. M.: Spatial variation in stable isotopic composition of organic matter of macrophytes and sediments from a small Arctic lake in west Greenland, *Arctic Antarctic And Alpine Research*, 50, <https://doi.org/10.1080/15230430.2017.1420282>, 2018.

St-Onge, G. and Hillaire-Marcel, C.: Isotopic constraints of sedimentary inputs and organic carbon burial rates in the Saguenay Fjord, Quebec, *Marine Geology*, 176, 1–22, [https://doi.org/10.1016/s0025-3227\(01\)00150-5](https://doi.org/10.1016/s0025-3227(01)00150-5), 2001.

**(15) L197 – Expand on how the 10 cm of sediment column was averaged.**

We adjusted [line 291](#) to specify the mean: We examined differences between the two fjords and among stations in terms of sedimentary TOC and TN content, C:N ratio, Chl-a content, and the Chl-a:CPE ratio, using data from both the upper 2 cm of the sediment surface and the arithmetic mean of the upper 10 cm sediment column.

**(16) L199 – How did you know the seasonal difference was insignificant?**

We clarified this in the text, in [line 293](#): Data from summer (2021) and spring (2022) were combined and treated as replicates, as the difference between the two seasons was insignificant (Welch’s ANOVA,  $p > 0.05$ ; see further). As a consequence, stations NK12, NK10, NK7, AM10 and AM5 have six replicates since they were sampled 200 in both seasons, while the other stations have three replicates as those stations were only sampled during spring 2022 (Table 1). Statistical analyses were performed using one-way ANOVA. Welch’s ANOVA was applied when variances were unequal, and the Kruskal-Wallis test was used when normality assumptions were violated.

## **Results**

**(17) L210-215 – I don’t agree that there is much difference between the sediment grain between NK13, NK12, NK10 and NK6 (inner and outer).**

We adjusted the text by nuancing the difference in grain size: [line 306](#): In Nuup Kangerlua, the median grain size ( $d_{0.5}$ ) exhibits a modest spatial trend from the inner to the outer fjord (Fig. 2). At the inner stations (NK13 and NK12), grain size remains relatively small ( $< 20 \mu\text{m}$ ) and consistent with depth, reflecting a stable depositional environment dominated by fine particles. Grain size at the mid-fjord stations (NK10 and NK9) is slightly larger but still within the fine-silt range, indicating only subtle hydrodynamic variation. At the outer stations (NK7 and NK6), grain size increases slightly further and shows more variability with depth, which may reflect localized influence of bottom currents or episodic input of coarser particles near the fjord mouth. Overall, differences in grain size between stations are relatively small, but a general trend toward coarser material at the fjord’s outer reaches is observable.

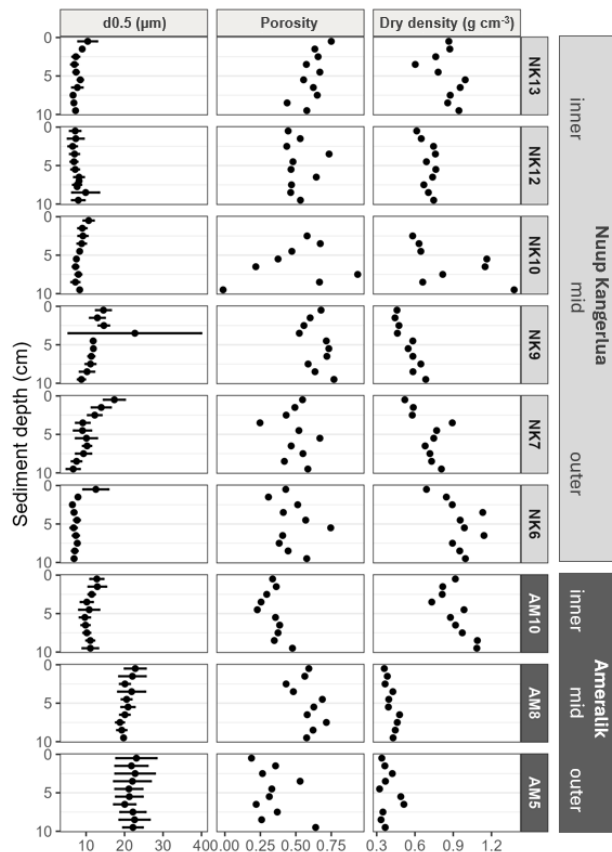

**Figure 2.** Sediment profiles of median grain size ( $\mu\text{m}$ ), porosity and dry density ( $\text{g cm}^{-3}$ ) of Nuup Kangerlua (GFNK stations) and Ameralik (AM stations). Error bars represent SD ( $n = 3$  NK6, NK9, NK13 and AM8 and  $n = 6$  for NK7, NK10, NK12, AM5 and AM10). Only one replicate for porosity and dry density.

(18) **L220 – Would be helpful to expand upon why porosity and dry bulk density (not mentioned in the methods) have been measured and what they tell us about the sediment dynamics?**

The following was added to 2.3 Sediment analysis section: [lines 159-162](#): Grain size, porosity and dry bulk density were measured to provide insights into the physical structure and depositional environment of the sediment column. High porosity typically indicates fine-grained, loosely packed sediments with higher water content, which are common in low-energy depositional environments. Conversely, lower porosity may suggest coarser, more compacted sediments, potentially reflecting higher-energy conditions or post-depositional consolidation.

The following was added after the description of porosity analysis: [line 177](#): Dry bulk density was obtained by dividing dry mass by bulk volume.

In addition, dry bulk density was also needed to calculate MAR as it was plotted against cumulative dry mass depth as well as to obtain SAR as specified in [line 270](#): Bulk sediment accumulation rates (SAR,  $\text{mm yr}^{-1}$ ) were calculated by dividing MAR by the average bulk density at each station.

## Discussion



**(19) L277 – introduces the term lability for the first time. Can this be expanded upon somewhere – what does it mean, what parameters have measured it and why does it matter?**

We added the following to 2.3. Sediment analysis section: **line 208**: The ratio of Chl-a to Chloroplastic Pigment Equivalent (CPE, comprising the sum of all aforementioned pigments) was used as a proxy for the “freshness” or lability of photosynthetically produced organic matter (Schubert et al., 2005; Koho et al., 2008).

Koho, K. A., García, R., De Stigter, H. C., Epping, E., Koning, E., Kouwenhoven, T. J., en Van Der Zwaan, G. J.: Sedimentary labile organic carbon and pore water redox control on species distribution of benthic foraminifera: A case study from Lisbon–Setúbal Canyon (southern Portugal), *Progress in Oceanography*, 79, 55–82, <https://doi.org/10.1016/j.pocean.2008.07.004>, 2008.

Schubert, C. J., Niggemann, J., Klockgether, G., en Ferdelman, T. G.: Chlorin Index: A new parameter for organic matter freshness in sediments, *Geochemistry Geophysics Geosystems*, 6, <https://doi.org/10.1029/2004gc000837>, 2005.

**(20) L320 – the temperature difference between the two fjord systems is a tangible difference and could be better highlighted. The discussion about Fe and Mn is interesting, but currently limited data to tease the two fjords apart.**

Following your comment, we removed the hypothesis of a difference in OC preservation related to Fe and Mn in both fjords as there is indeed too little data to formulate arguments. In addition, we rephrased the paragraph in the discussion on bottom water temperature differences, applying our measurements. **Lines 445-458**: “Since most of the OC deposited in both fjords is of marine origin, any differences in organic matter preservation between them are likely driven by environmental conditions rather than by differences in the nature of the organic material itself. The distinct geomorphology of Ameralik and Nuup Kangerlua, particularly their differing sill depths, likely shapes bottom water temperatures and may influence organic matter preservation within the fjords. Both fjords have no anoxic deep water masses and bottom water renewal occurs every one to two years (Mortensen, 2011; Stuart-Lee et al., 2021), but bottom water temperature differs. Ameralik’s shallower sill depth (~110 m) compared to Nuup Kangerlua (~200 m) restricts the inflow of warmer, saltier coastal waters (Stuart-Lee et al., 2021). Consequently, during field sampling, bottom water temperatures in Nuup Kangerlua were consistently warmer than in Ameralik, particularly in spring, with average values of 1.33 °C and 0.53 °C, respectively. The lower bottom water temperatures in Ameralik may cause the observed higher pigment and OC preservation in AM5 by reducing microbial degradation and slowing remineralization processes. A comparative study of several Svalbard fjords suggested that relatively higher pigment content in sediments may be linked to lower bottom water temperatures (Krajewska et al., 2020). However, this hypothesis warrants further investigation, as Arctic microbial communities are well adapted to low temperatures, and mineralization rates below 10 °C appear to differ only minimally (Thamdrup et al., 2007; Scholze et al., 2020).”

**(21) L389 – No mention about the biomass of benthic invertebrates which may adapt to respond to the variable MAR rates at the two fjords – i.e. the increase in MAR at Nuup Kangerlua may fuel a higher biomass benthos which results in similar OCBRs within both fjords. The benthic biology may be important here?**

There is work in progress by colleagues at the Greenlandic Institute of Natural Resources on epibenthos biomass. However, no results are available yet. We therefore chose to leave it out in the paragraph regarding OC uptake by the food web to keep this section brief and only based on what is known. We did, however, add benthic biomass in the future research section (see below): **line 585:** Accurate carbon budget construction requires integrated knowledge of primary production, zooplankton grazing, pelagic and benthic biomass as well as pelagic and benthic mineralization rates (Spilling et al., 2019), which are currently limited or lacking for these fjord systems.

**(22) A section on Recommendations for further research would be helpful.**

We applied your comment and added the following section (**lines 576-592**):

#### **4.4 Recommendations for future research**

The expected link between elevated surface primary production in MTG-influenced fjords and OCBR was not observed. Future studies should therefore examine the mechanisms controlling this mismatch between pelagic productivity and sediment burial. In addition, our results imply that glacial influence is not necessarily the most important factor steering OCBR, which means that more Greenland fjord systems should be studied to better understand the effect of retreating MTGs on OC burial. Based on our results we identified the following avenues for future research:

1. Mass accumulation rates and OCBRs need to be studied in Greenlandic and other Arctic fjords, ideally applying the CRS method, for standardized comparisons. As not all of our MARs could be determined by the CRS method, these estimates should be verified in the future.
2. Accurate carbon budget construction requires integrated knowledge of primary production, zooplankton grazing, pelagic and benthic biomass as well as pelagic and benthic mineralization rates (Spilling et al., 2019), which are currently limited or lacking for these fjord systems. These parameters help quantify the mismatch between OC production and burial, which may arise from lateral transport processes or from OC incorporation into higher trophic levels. To address this, a more comprehensive understanding of food web dynamics and carbon flow in both fjords is essential.
3. An understanding of benthic OC cycling is important for quantifying carbon turnover at the sediment-water interface, potentially revealing processes that drive differences in OC burial efficiency in different fjord systems.

**(23) The discussion and conclusion rely heavily on hypothetical scenarios due to a lack of data/observations for what is a very complex system. I appreciate the thought that has gone into trying to explain the results found within this study, however more data would be needed to do this. I think more could be done to look at the spatial distribution of sediments within the fjord systems as this can help to better understand hydrodynamics of the system as well as the benthic communities and carbon processing. There are more questions than answers resulting from this study, which is fine, however the authors may wish to refine their discussion to focus on what could be understood/ concluded from the results and provide recommendations for Further Work/ Research to build a stronger picture.**

Applying your feedback, we reformulated large parts of the discussion and reorganized the discussion to the following structure:

- **4.1 Surface sediment OC content** with a sub-section on **OC origin** (4.2.1), putting more emphasis on what can be derived from our data.
- **4.2 Organic carbon burial rates**, which was set as the 2<sup>nd</sup> sub section instead of the last paragraph. We also included primary production values from literature.
- We assembled our 3 main hypotheses in sub-sections within **4.3 Pelagic and geomorphological influence on OC burial**:
  - o **4.3.1 OC preservation conditions**, which was condensed and more focused on the bottom water temperature differences we measured between the fjords. We removed the hypothesis regarding a difference in OC preservation related to Fe and Mn in both fjords from the discussion due to limited data to support this hypothesis.
  - o We condensed section **4.3.2 Transport dynamics**. This section was included to provide a more nuanced view of MTG-induced upwelling, acknowledging that nutrient enrichment may also originate from upwelling at the fjord mouth, potentially influencing the patterns observed in our study. Regarding your remark on sediment distribution, we rephrased **lines 472-477**: “The slightly coarser grain size at Ameralik’s mid and outer stations, despite their distance from glacial input, may indeed reflect input from the entrance sill. Furthermore, the topography of Ameralik with the deep depression behind the sill can promote downslope transport and sediment accumulation, resulting in the relative higher TOC and pigment content at AM5 (Hargrave and Nielsen, 1976; Wassmann et al, 1984; Erlandsson, 2008). Therefore, hydrodynamics, downslope transport, or a combination of both can decouple surface productivity from local sediment deposition.”
  - o We condensed the **4.3.3 Food web OC uptake** section.
- We incorporated your suggestion to add a section on Recommendations for future research. (As mentioned in (22)).

To avoid an overly long rebuttal letter, we refer the reviewer to our rewritten discussion in the manuscript. (From line **371** onwards).

## **Conclusion**

- (24) **L399 – There isn’t enough evidence to suggest that MTGs DO function as carbon pumps – Perhaps change wording to COULD function as carbon pumps.**

Thank you for your insight. We replaced “do” with “could”.

## **Technical Corrections:**

- (25) **L125 – TOC and TN not defined yet.**

Thank you for noticing this error. We therefore changed **line 143**: “At each station, three deployments were carried out for granulometry, pigment, total organic carbon (TOC) and total nitrogen (TN) analysis ...”

- (26) **L127 – grammatical point – fewer stations rather than less stations. Although Table 1 shows that there were the same number of stations sampled in both years?**

We adjusted **line 145**: Fewer sediment stations were sampled in 2021 compared to 2022; however, bottom water temperature measurements were obtained in both years (Table 1).

(27) L140 – text missing – change to ‘conforming to the Wentworth scale’

Changed to Line 168: Grain size fractions were classified according to the Wentworth scale (1922) as clay (< 4 µm), silt (4 – 63 µm), and sand (63 – 500 µm).

(28) Figure 4 – Can the values for the terrestrial and marine end members be shown – the range for 15N for marine is very broad – is that right?

Thank you for your suggestion. We have therefore revised Figure 4 (line 356) including other remarks of other reviewers. We improved this figure by:

- Enlarging all elements of the figure.
- Adding a second panel, displaying  $\delta^{13}\text{C}$  against C:N ratio. We indicated the marine and terrestrial end-member  $\delta^{13}\text{C}$  values used in this study to determine the proportion of marine and terrestrial OC.
- Colors referring to Nuup Kangerlua and Ameralik were adapted to follow the color code of the map (Figure 1; line 122).
- In panel (a), we extended the marine and terrestrial ranges of panel (a) from  $\delta^{13}\text{C}$  -23 ‰ to  $\delta^{13}\text{C}$  -24‰ and from  $\delta^{15}\text{N}$  -25 ‰ to  $\delta^{15}\text{N}$  -21‰ (following Lamb et al., 2006), respectively.

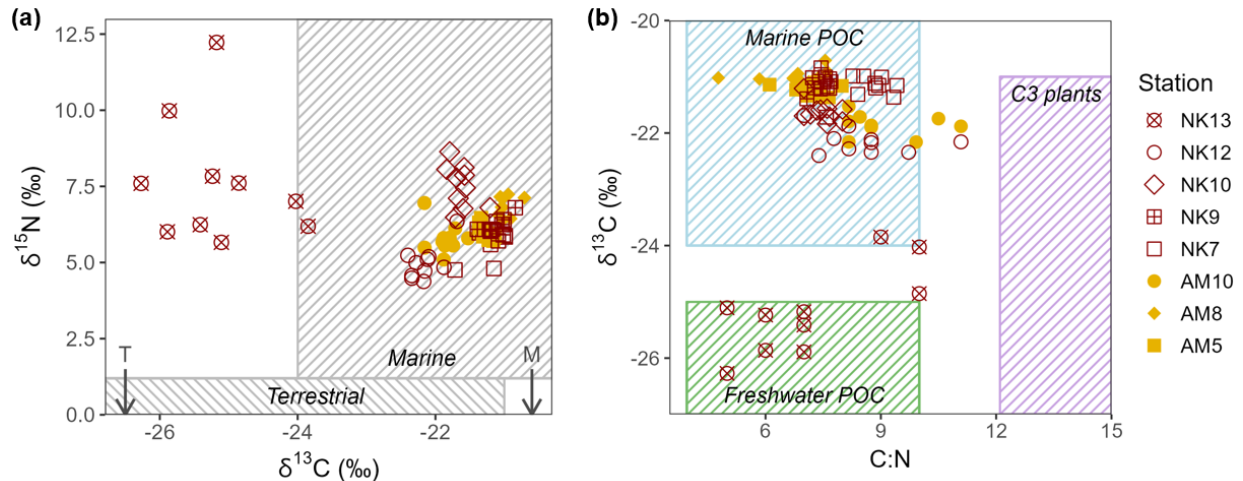

**Figure 4.** (a)  $\delta^{13}\text{C}$  (‰ deviations from V-PDB) values plotted against  $\delta^{15}\text{N}$  (‰ deviations from air) values of the POM present in the sediment for the different station of Ameralik (filled symbols) and Nuup Kangerlua (open symbols). Typical marine and terrestrial ranges of  $\delta^{13}\text{C}$  (Lamb et al., 2006) and  $\delta^{15}\text{N}$  (Zaborska et al., 2018) are indicated with rectangles. (b)  $\delta^{13}\text{C}$  plotted against C:N ratios. Ranges of marine and freshwater POC, and C3 terrestrial plants are displayed as rectangles for reference (values taken from Lamb et al., 2006). Marine (M) and terrestrial (T)  $\delta^{13}\text{C}$  end-members used in this study are indicated with arrows.

(29) Figure 5 – Data in blue and yellow represent the MTGs and LTGs respectively (red used in error). The mixed type is Red. Where have all the Greenland data points come from in 5b between 70-75N?

We adjusted the figure caption by specifying the sources from which we extracted the data: line 404:

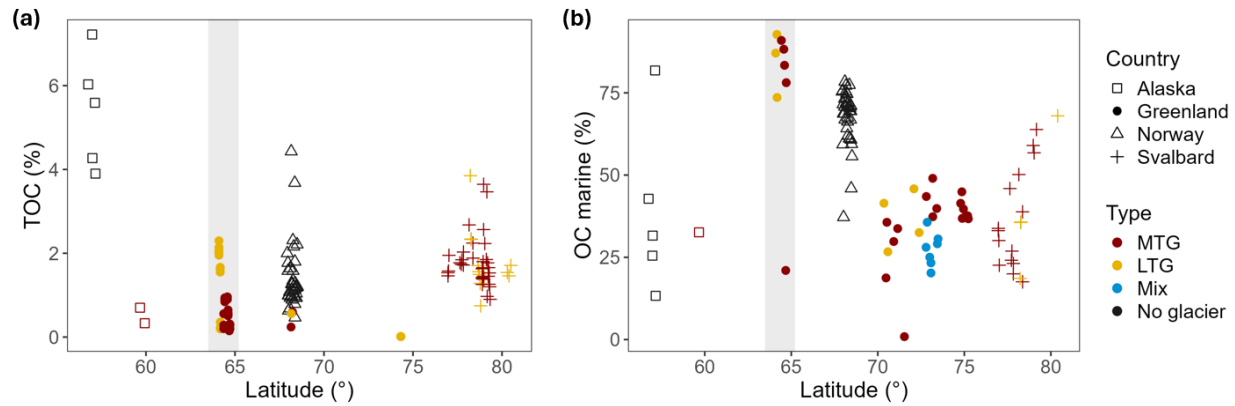

**Figure 5: (a)** TOC content of surface sediments along latitude. Data compiled from Smith et al. (2002), Thamdrup et al. (2007), Koziorowska et al. (2015), Cui et al. (2016a); Faust and Knies (2019), Włodarska-Kowalczyk et al. (2019), Laufer-Meiser et al. (2021) and this study. **(b)** Fraction of TOC of marine origin along latitude. Data compiled from Koziorowska et al. (2015), Faust and Knies (2019) and this study. Both figures display data from fjords located in high latitude countries: Alaska, Greenland, Norway and Svalbard. The grey band constraints the Greenland fjords investigated in this study. Data indicated in red and yellow represent Marine terminating-glacier (MTG) and land terminating-glacier (LTG)-influenced fjord systems, respectively. The mixed type represents fjords where the dominance of MTG(s) vs LTG(s) on the fjord's hydrology could not be differentiated from literature or satellite images are depicted in blue. Non-glacial fjords are represented in black. Both graphs were created following and updating the example of Faust and Knies (2019).

## Figure 6 – write out the word transport

We applied your comment in figure 6 and changed some colours. (Line 557).

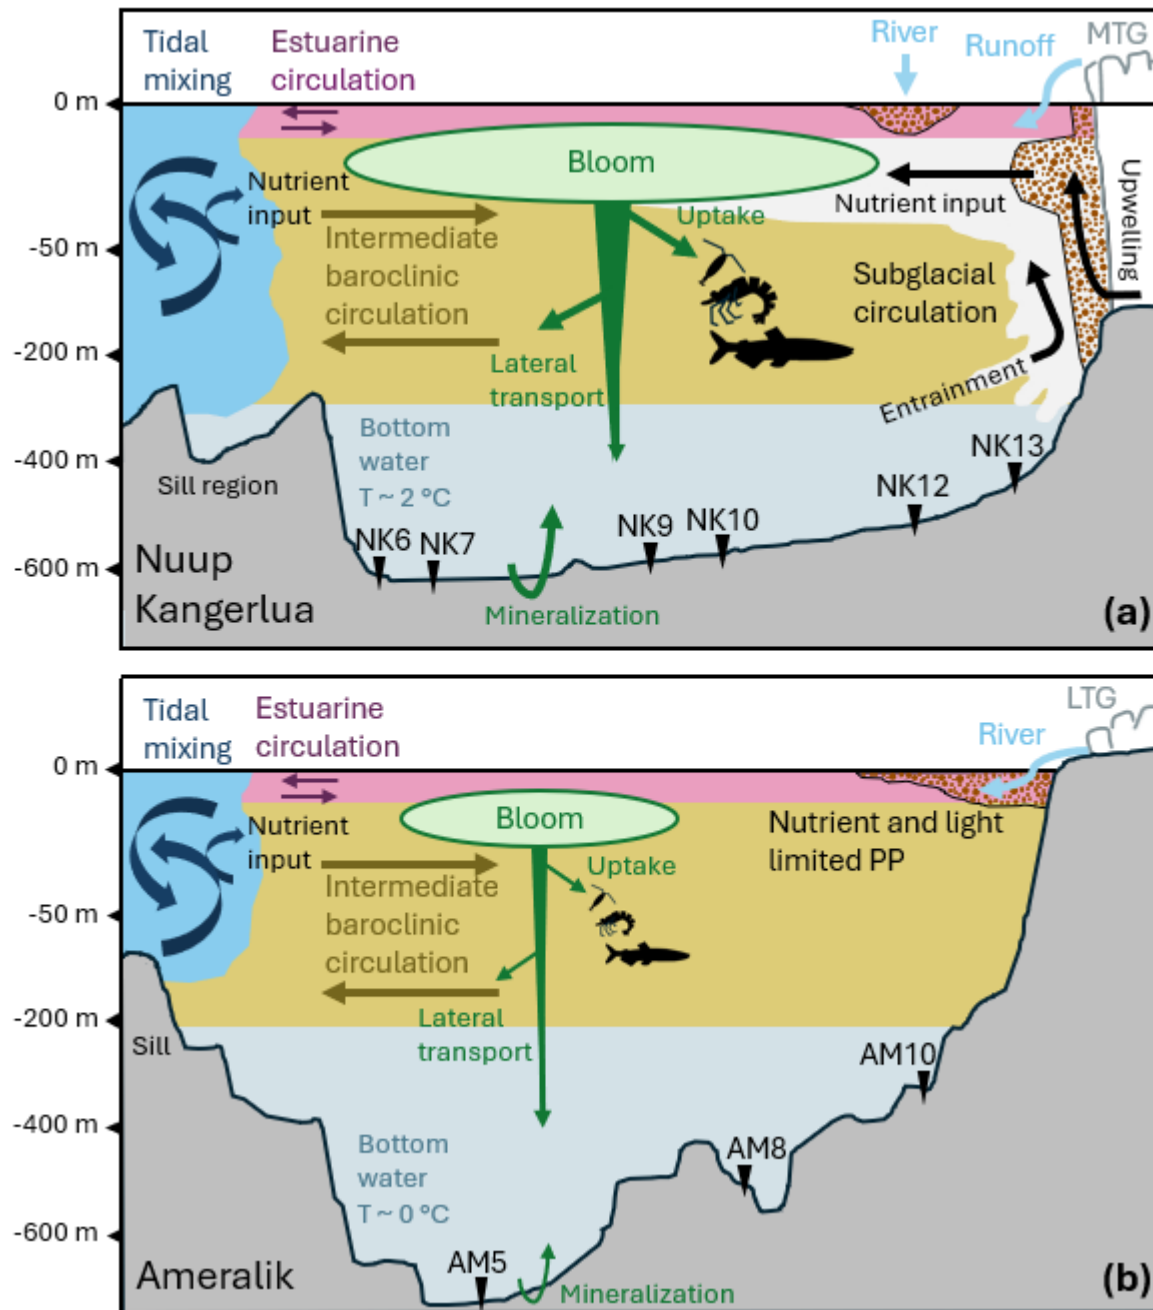

**Figure 6:** Schematic cross-sectional view of current regime and possible ways of phytoplankton or OC flow during summer in Nuup Kangerlua (a) and Ameralik (b) fjord systems. Tidal mixing above the sill area, estuarine circulation and intermediate baroclinic circulation occurs in both fjord systems, while the presence of MTGs in Nuup Kangerlua drives subglacial circulation through subglacial discharge. Nutrients are brought to the euphotic zone via tidal mixing and subglacial circulation. Turbid plumes, indicative of suspended sediment and organic matter input from glacier discharge and river runoff, are represented by the shaded brown texture. Green arrows represent phytoplankton or OC transport and remineralization of organic carbon at the sediment-water interface. A wider arrow points to higher expected flows. Station locations are marked along the fjords. The current dynamics illustrated for Nuup Kangerlua are based on Mortensen et al. (2018) and Stuart-Lee et al. (2023), while those for Ameralik are derived from Stuart-Lee et al. (2021; 2023).



**(30) A2 – dots are grey, not orange.**

Thank you for noticing this error. We adjusted the figure caption to: "... Grey and black colors represent end of summer 2021 and spring 2022, respectively. Data from the two seasons is available for stations NK12, NK7, AM10 and AM5." (Line 661).
